# Supplementary material for: From [B6O13]8− to [GaB5O13]8− to [Ga{B5O9(OH)}{BO(OH)2}]2−: synthesis, structure and nonlinear optical properties of new metal borates
Source: Royal Society of Chemistry journal article supplement (doi:10.1039/d1ce00719j), 2021-01-01
Supplement: d1ce00719j1.pdf [file d1ce00719j1.pdf]

## Supporting Information

From  $[\text{B}_6\text{O}_{13}]^{8-}$  to  $[\text{GaB}_5\text{O}_{13}]^{8-}$  to  $[\text{Ga}\{\text{B}_5\text{O}_9(\text{OH})\}\{\text{BO}(\text{OH})_2\}]^{2-}$ :

Synthesis, structure and nonlinear optical property

of the new metal borates

Qi-Ming Qiu and Guo-Yu Yang\*

*MOE Key Laboratory of Cluster Science, School of Chemistry and Chemical Engineering, Beijing Institute of Technology, Beijing 100081, China. E-mail: ygy@bit.edu.cn, Fax: (+86)10-6891-8572*

### Table of Contents

|                                                                                                                                                                   |   |
|-------------------------------------------------------------------------------------------------------------------------------------------------------------------|---|
| <b>Table S1</b> Selected bond distances (Å) and angles (°) for <b>1</b> .....                                                                                     | 1 |
| <b>Table S2</b> Selected bond distances (Å) and angles (°) for <b>2</b> .....                                                                                     | 1 |
| <b>Table S3</b> Selected bond distances (Å) and angles (°) for <b>3</b> .....                                                                                     | 2 |
| <b>Table S4</b> Selected H-bonding distances (Å) and angles (°) for <b>1</b> .....                                                                                | 3 |
| <b>Table S5</b> Selected H-bonding distances (Å) and angles (°) for <b>2</b> .....                                                                                | 3 |
| <b>Table S6</b> Selected H-bonding distances (Å) and angles (°) for <b>3</b> .....                                                                                | 3 |
| <b>Fig. S1</b> View of cubic cavity, topology network and stacking structures of <b>1</b> .....                                                                   | 4 |
| <b>Fig. S2</b> View of the 9-MR channels along the <i>b</i> axis in <b>2</b> .....                                                                                | 4 |
| <b>Fig. S3</b> Structure comparisons between <b>2</b> and <b>2a</b> .....                                                                                         | 5 |
| <b>Fig. S4</b> The asymmetric unit and 1D chain of $[\text{Ga}(\text{en})_2][\text{B}_5\text{O}_8(\text{OH})_2]\cdot\text{H}_2\text{O}$ ( <b>3a</b> ).....        | 5 |
| <b>Fig. S5</b> PXRD patterns show the comparison between the experimental value and calculated ones for compounds <b>1(a)</b> , <b>2(b)</b> and <b>3(c)</b> ..... | 6 |
| <b>Fig. S6</b> TG curves for compounds <b>1(a)</b> , <b>2(b)</b> and <b>3(c)</b> .....                                                                            | 7 |
| <b>Fig. S7</b> IR spectra for compounds <b>1(a)</b> , <b>2(b)</b> and <b>3(c)</b> .....                                                                           | 8 |
| <b>Fig. S8</b> UV/Vis diffuse reflectance spectra of compounds <b>1(a)</b> , <b>2(b)</b> and <b>3(c)</b> .....                                                    | 9 |
| <b>Fig. S9</b> Oscilloscope traces of SHG signals for compound <b>2</b> and $\text{LiNbO}_3$ .....                                                                | 9 |

**Table S1** Selected bond distances (Å) and angles (°) for **1**

|                     |             |                       |             |
|---------------------|-------------|-----------------------|-------------|
| O2—K <sup>ii</sup>  | 3.346 (2)   | O2—B2 <sup>i</sup>    | 1.453 (2)   |
| K—O1 <sup>iv</sup>  | 2.7906 (14) | O1—B1                 | 1.358 (2)   |
| K—O1 <sup>v</sup>   | 2.7906 (14) | O1—B2                 | 1.4457 (19) |
| K—O1                | 2.7906 (14) | O3—B1                 | 1.3632 (19) |
| K—O1 <sup>vi</sup>  | 2.9148 (15) | O3—B2 <sup>vii</sup>  | 1.457 (2)   |
| K—O1 <sup>vii</sup> | 2.9148 (15) | O4—B2 <sup>i</sup>    | 1.5304 (16) |
| K—O1 <sup>iii</sup> | 2.9148 (15) | O4—B2 <sup>viii</sup> | 1.5304 (16) |
| K—O5                | 3.113 (3)   | O4—B2                 | 1.5304 (16) |
|                     |             | O2—B1                 | 1.377 (2)   |

Symmetry codes: (i)  $y, z, x$ ; (ii)  $-x + 1, y - 1/2, -z + 1/2$ ; (iii)  $-x + 1, -y + 1, -z$ ; (iv)  $-y + 1, z + 1/2, -x + 1/2$ ; (v)  $-z + 1/2, -x + 1, y - 1/2$ ; (vi)  $y, -z + 1/2, x - 1/2$ ; (vii)  $z + 1/2, x, -y + 1/2$ ; (viii)  $z, x, y$ .

**Table S2** Selected bond distances (Å) and angles (°) for **2**

|                       |            |       |            |
|-----------------------|------------|-------|------------|
| Ga—O1                 | 1.795 (10) | O1—B1 | 1.359 (19) |
| Ga—O6 <sup>ii</sup>   | 1.801 (10) | O3—B1 | 1.39 (2)   |
| Ga—O10 <sup>iii</sup> | 1.832 (9)  | O3—B2 | 1.41 (2)   |
| Ga—O8 <sup>iv</sup>   | 1.834 (9)  | O5—B3 | 1.390 (18) |
| B5—O9 <sup>i</sup>    | 1.432 (17) | B4—O9 | 1.358 (18) |
| B5—O5                 | 1.47 (2)   | O7—B4 | 1.363 (18) |
| B5—O2                 | 1.48 (2)   | B3—O4 | 1.367 (18) |
| B5—O10                | 1.507 (16) | B2—O4 | 1.482 (19) |
| O8—B4                 | 1.358 (17) | O7—B2 | 1.460 (17) |
| O10—B2                | 1.550 (17) | N2—C1 | 1.46 (2)   |
| O6—B3                 | 1.316 (19) | C2—C1 | 1.47 (2)   |
| O2—B1                 | 1.348 (18) | N1—C2 | 1.493 (19) |
| N2—C1                 | 1.46 (2)   | C2—C1 | 1.47 (2)   |

Symmetry codes: (i)  $x + 1, y, z$ ; (ii)  $x, y + 1, z$ ; (iii)  $x, -y + 1, z + 1/2$ ; (iv)  $x + 1, -y + 1, z + 1/2$ .

**Table S3** Selected bond distances (Å) and angles (°) for **3**

|                       |           |        |           |
|-----------------------|-----------|--------|-----------|
| Cs—O8 <sup>i</sup>    | 2.997 (4) | O3—B1  | 1.357 (7) |
| Cs—O4                 | 3.013 (4) | O3—B3  | 1.485 (7) |
| Cs—O13 <sup>ii</sup>  | 3.137 (4) | O2—B1  | 1.364 (7) |
| Cs—O10 <sup>iii</sup> | 3.173 (4) | O2—B2  | 1.381 (7) |
| Cs—O12 <sup>i</sup>   | 3.340 (5) | O9—B5  | 1.387 (7) |
| Cs—O11 <sup>iv</sup>  | 3.454 (4) | O9—B4  | 1.406 (6) |
| Cs—O2                 | 3.457 (4) | O5—B2  | 1.376 (7) |
| Cs—O9 <sup>i</sup>    | 3.530 (4) | O5—B3  | 1.444 (6) |
| Ga—O11                | 1.803 (4) | O11—B6 | 1.340 (7) |
| Ga—O8 <sup>v</sup>    | 1.806 (4) | O6—B4  | 1.357 (7) |
| Ga—O10                | 1.813 (4) | O6—B3  | 1.470 (7) |
| Ga—O4 <sup>iv</sup>   | 1.822 (4) | O4—B2  | 1.332 (6) |
| Na—O1 <sup>iii</sup>  | 2.333 (4) | O7—B5  | 1.352 (7) |
| Na—O10                | 2.383 (4) | O7—B3  | 1.469 (7) |
| Na—O5 <sup>iv</sup>   | 2.424 (4) | O8—B4  | 1.342 (7) |
| Na—O6 <sup>v</sup>    | 2.555 (4) | O13—B6 | 1.371 (7) |
| Na—O7                 | 2.671 (4) | O10—B5 | 1.362 (7) |
| Na—O5 <sup>v</sup>    | 2.871 (4) | O12—B6 | 1.370 (7) |
| Na—O7 <sup>iv</sup>   | 2.981 (4) | O1—B1  | 1.387 (7) |

Symmetry codes: (i)  $x, y - 1, z - 1$ ; (ii)  $x - 1, y - 1, z - 1$ ; (iii)  $-x + 1, -y, -z + 1$ ; (iv)  $-x + 1, -y + 1, -z + 1$ ; (v)  $x + 1, y, z$ .

**Table S4** Selected H-bonding distances (Å) and angles (°) for **1**

| D-H    | d(D-H) | d(H···A) | ∠DHA | d(D···A) | A  | Symmetry                      |
|--------|--------|----------|------|----------|----|-------------------------------|
| O7-H7  | 0.78   | 1.80     | 117  | 2.226    | O7 | [ -x + 1, -y, -z + 2 ]        |
| O5-H5A | 0.87   | 1.74     | 124  | 2.338    | O2 | [ -x + 1, y + 1/2, -z + 1/2 ] |
| O5-H5B | 0.86   | 1.78     | 121  | 2.338    | O2 | [ -y + 1/2, -z + 1, x - 1/2 ] |
| O5-H5A | 0.87   | 1.53     | 146  | 2.299    | O3 | [ -x + 1, y + 1/2, -z + 1/2 ] |
| O5-H5B | 0.86   | 1.54     | 145  | 2.299    | O3 | [ -y + 1/2, -z + 1, x - 1/2 ] |
| O6-H6  | 0.85   | 2.47     | 158  | 3.265    | O1 | [ y, -z + 1/2, x + 1/2 ]      |

**Table S5** Selected H-bonding distances (Å) and angles (°) for **2**

| D-H    | d(D-H) | d(H···A) | ∠DHA | d(D···A) | A  | Symmetry               |
|--------|--------|----------|------|----------|----|------------------------|
| N1-H1E | 0.89   | 2.39     | 175  | 3.275    | O7 | [ x, -y, z + 1/2 ]     |
| N1-H1D | 0.89   | 1.81     | 174  | 2.693    | O4 |                        |
| N1-H1C | 0.89   | 1.85     | 168  | 2.724    | O5 | [ x - 1, y, z ]        |
| N2-H2E | 0.89   | 2.27     | 163  | 3.134    | O9 | [ x, -y + 1, z + 1/2 ] |
| N2-H2D | 0.89   | 2.04     | 160  | 2.890    | O1 | [ x, -y + 1, z + 1/2 ] |
| N2-H2C | 0.89   | 1.97     | 151  | 2.782    | O8 | [ x, y, z + 1 ]        |

**Table S6** Selected H-bonding distances (Å) and angles (°) for **3**

| D-H     | d(D-H) | d(H···A) | ∠DHA | d(D···A) | A   | Symmetry                   |
|---------|--------|----------|------|----------|-----|----------------------------|
| O13-H13 | 0.82   | 1.94     | 176  | 2.761    | O3  | [ -x + 1, -y + 1, -z + 2 ] |
| O12-H12 | 0.82   | 2.45     | 129  | 3.035    | O9  | [ -x + 1, -y + 2, -z + 2 ] |
| O12-H12 | 0.82   | 2.41     | 127  | 2.974    | O11 | [ -x + 1, -y + 2, -z + 2 ] |
| O1-H1   | 0.82   | 1.97     | 163  | 2.766    | O12 | [ -x + 1, -y + 1, -z + 2 ] |

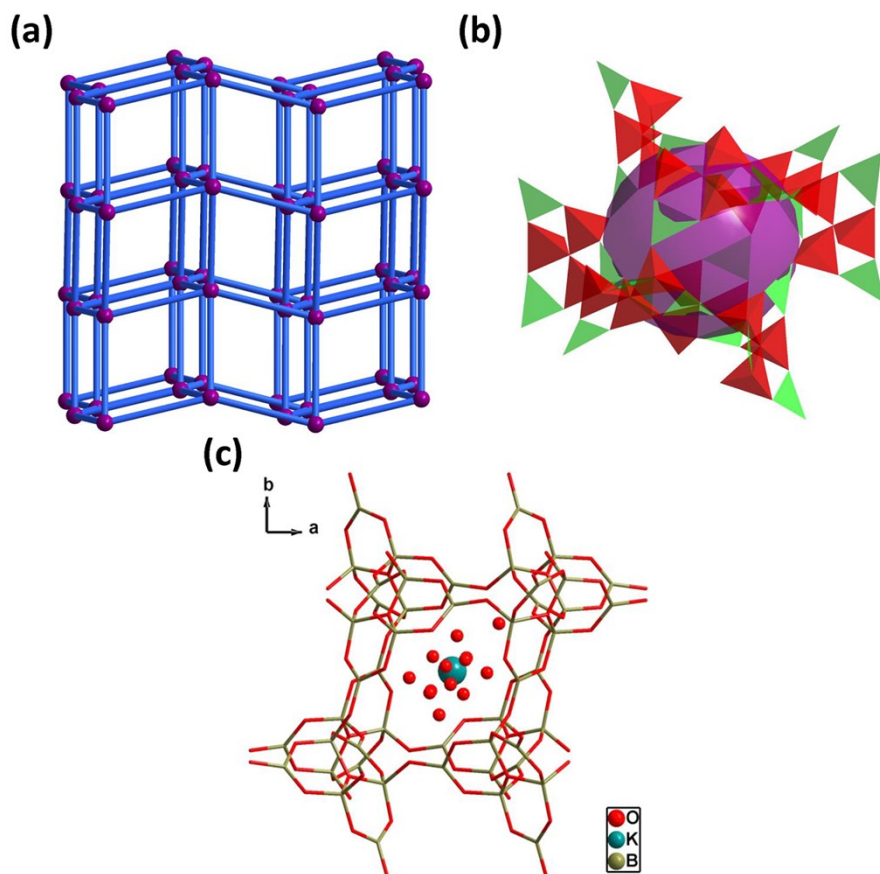

**Fig. S1** (a) The topology network of **1**, the  $\{B_6\}$ -1 clusters are shown as purple nodes. (b) View of the cubic cavity constructed from eight  $\{B_6\}$ -1 clusters of **1**. (c) The stacking structures filling with guest ions/molecules along the  $c$  axis of **1**.

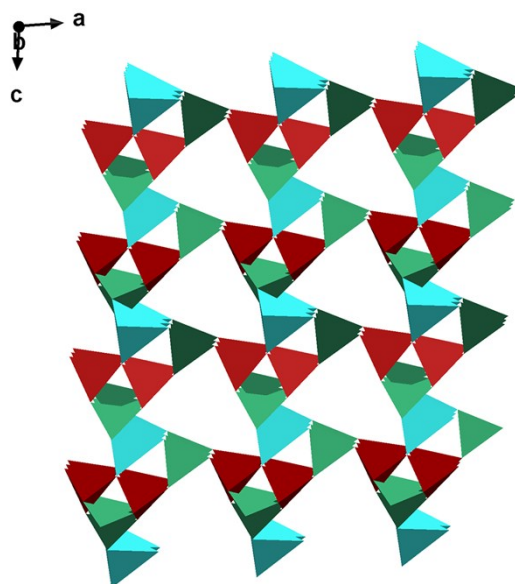

**Fig. S2** View of the 9-MR channels along the  $b$  axis in **2**.

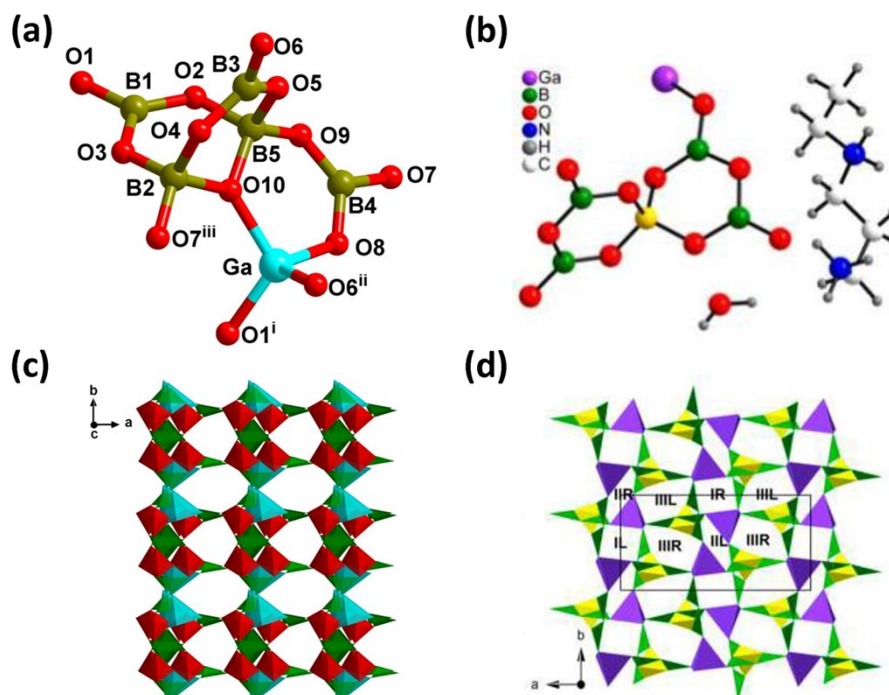

**Fig. S3** (a) View of the structure of  $[\text{GaB}_5\text{O}_{13}]^{8-}$  in compound **2**, symmetry codes: (i)  $x, 1 - y, -0.5 + z$ ; (ii)  $x, -y, -0.5 + z$ ; (iii)  $1 + x, y, z$ . (b) The asymmetric unit of **2a**. (c) View of the 9-MR channels along the  $c$  axis in **2**. (d) Polyhedral representation of the framework and three pairs of 8-MR channels along the  $c$  axis in **2a**.

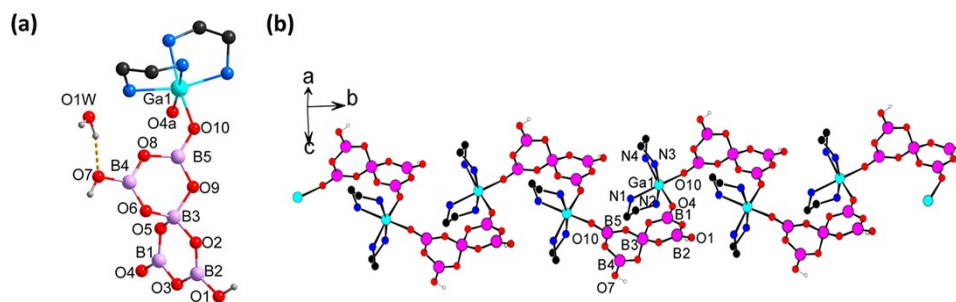

**Fig. S4** (a) The asymmetric unit and (b) 1D chain of  $[\text{Ga}(\text{en})_2][\text{B}_5\text{O}_8(\text{OH})_2] \cdot \text{H}_2\text{O}$  (**3a**). Cited from *Inorg. Chem.*, 2012, **51**, 8810–8817.

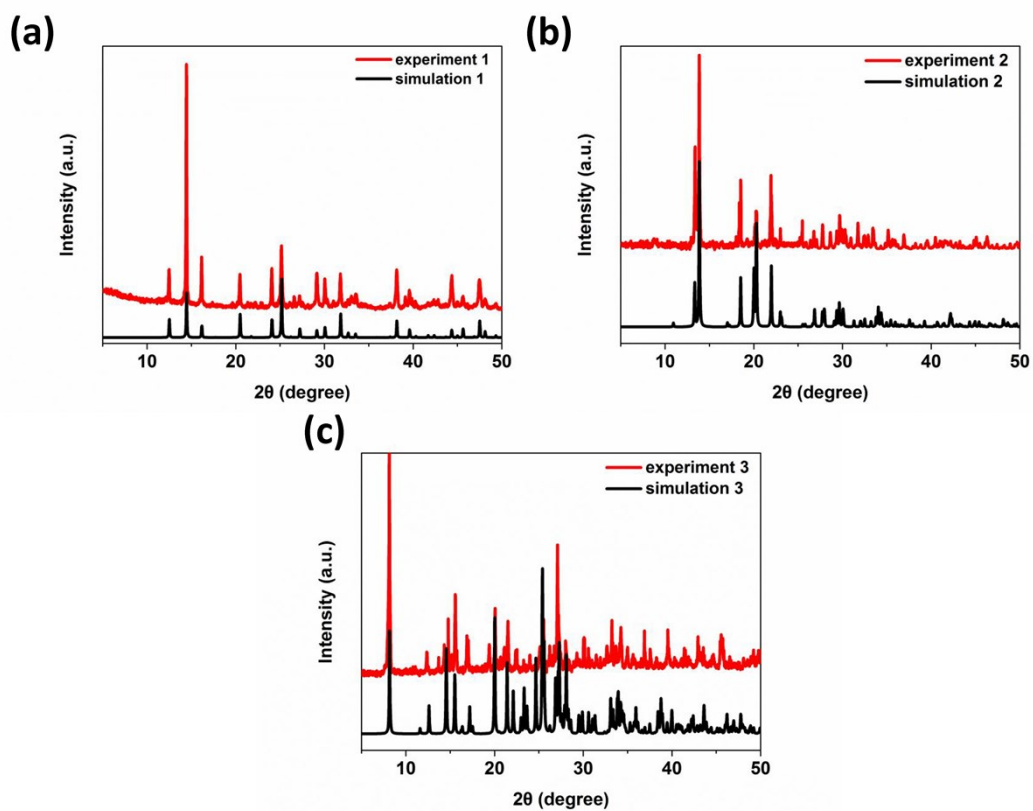

**Fig. S5** PXRD patterns show the comparison between the experimental value and calculated ones for compounds **1**(a), **2**(b) and **3**(c).

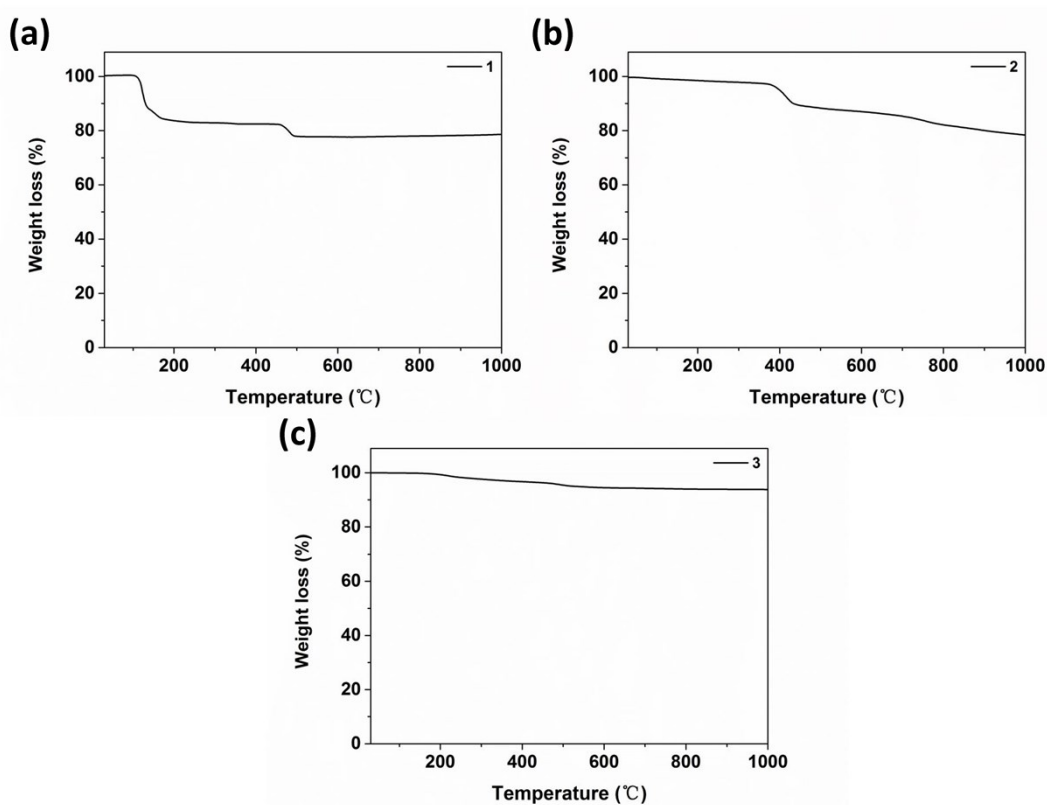

**Fig. S6** TG curves for compounds **1**(a), **2**(b) and **3**(c).

The Thermogravimetric (TG) curves of compound **1–3** can be stable up to about 120, 380 and 180 °C, respectively. For **1**, the initial weight loss (obs. 15.8%, cal. 15.4%) in the temperature range 120–190°C is assigned to the loss of the water molecule. The second step ranging from 450–520°C corresponds to the dehydration of the hydrogen ion per formula unit (obs. 4.8%, cal. 4.7%). For **2**, the guest molecules were gradually lost from 380 to 800 °C (obs. 18.5%, cal. 17.9%). For **3**, the weight loss 6.4 % (cal. 5.4 %) in the temperature range 180–650°C is attributed to the removal of dehydration of the hydroxyls.



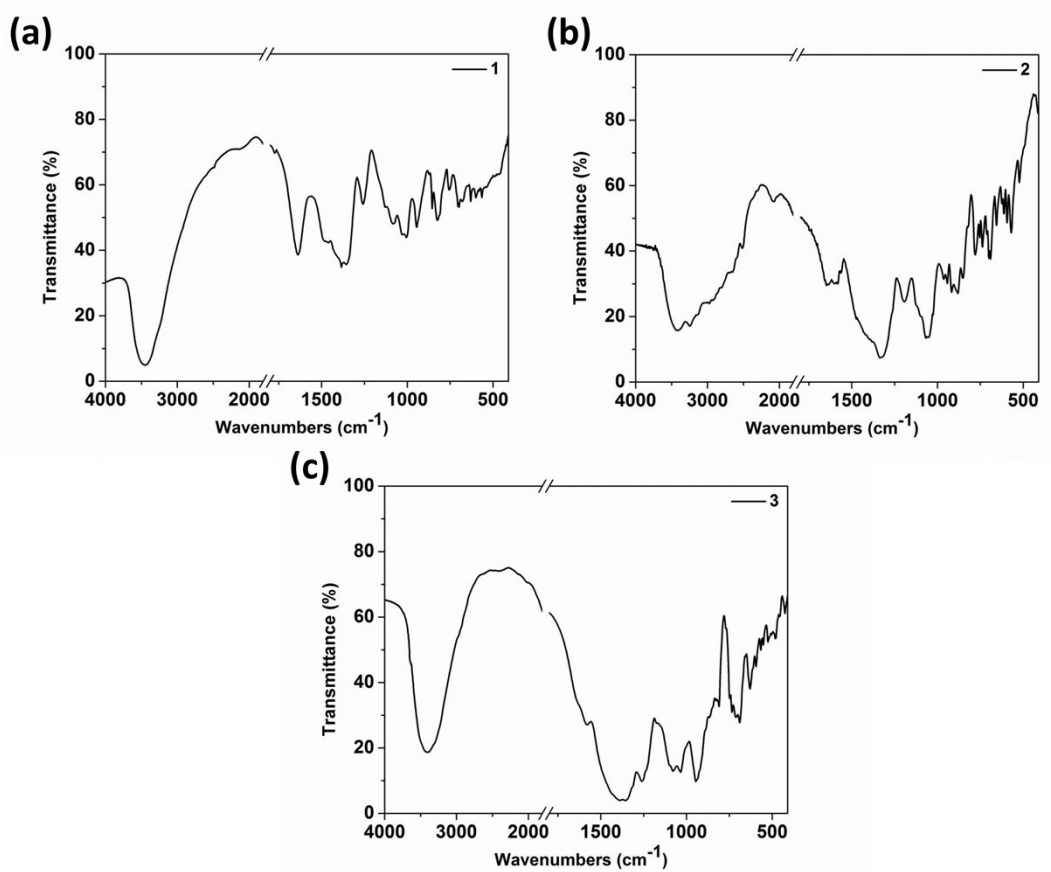

**Fig. S7** IR spectra for compounds **1(a)**, **2(b)** and **3(c)**.

As for the IR spectra in **1–3**, the absorption bands around 3500–3000  $\text{cm}^{-1}$  are related to vibrations of the O–H or N–H bonds. The stretching of  $\text{BO}_3$  and  $\text{BO}_4$  units are located at 1384–1334  $\text{cm}^{-1}$ , 1260–1258  $\text{cm}^{-1}$ , 963–945  $\text{cm}^{-1}$ , 881–810  $\text{cm}^{-1}$ , 698–689  $\text{cm}^{-1}$ , respectively. The results of TGA and IR spectra are agreement with the single-crystal structures of **1–3**.

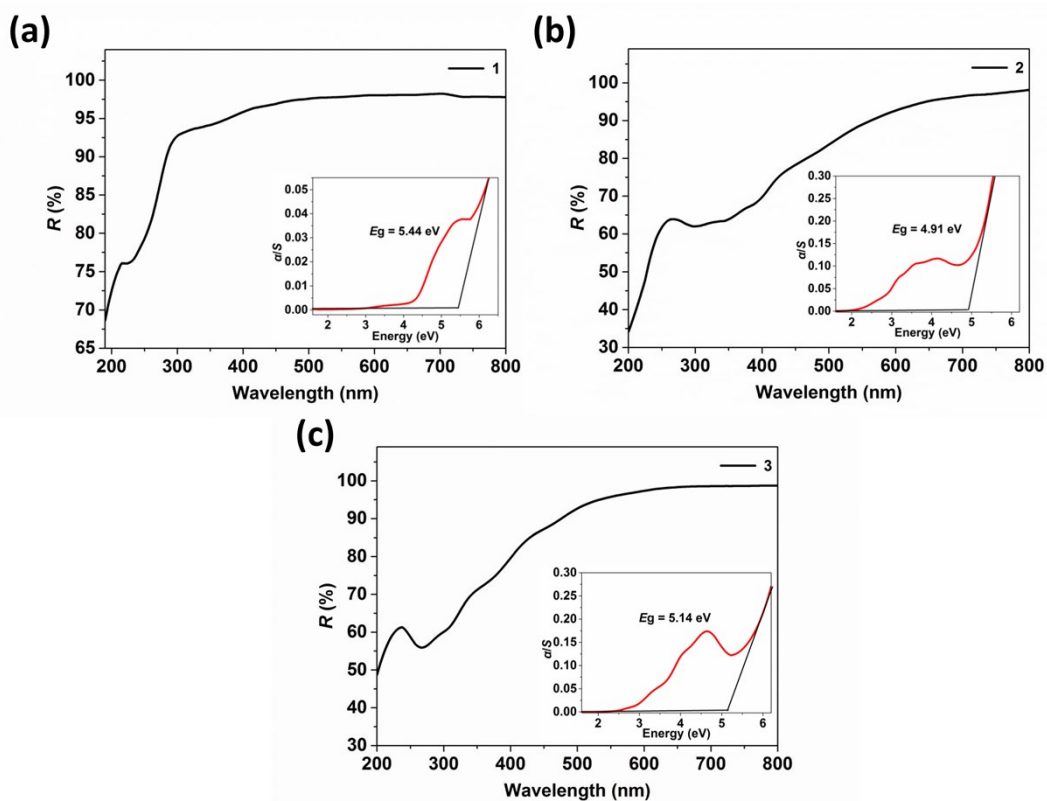

**Fig. S8** UV/Vis diffuse reflectance spectra of compounds **1**(a), **2**(b) and **3**(c). Inset: plots of  $\alpha/S$  vs.  $E$ .

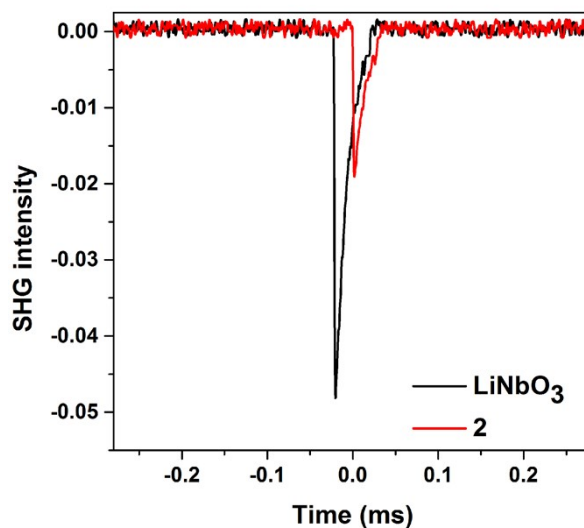

**Fig. S9** Oscilloscope traces of SHG signals for compound **2** and  $\text{LiNbO}_3$  in the same particle size of 150–212  $\mu\text{m}$ .
